# Supplementary material
Source: publisher figshare collection journal article supplement (https://frontiersin.figshare.com/ndownloader/files/34539509)
Supplement: Supplementary file [file 34539509]

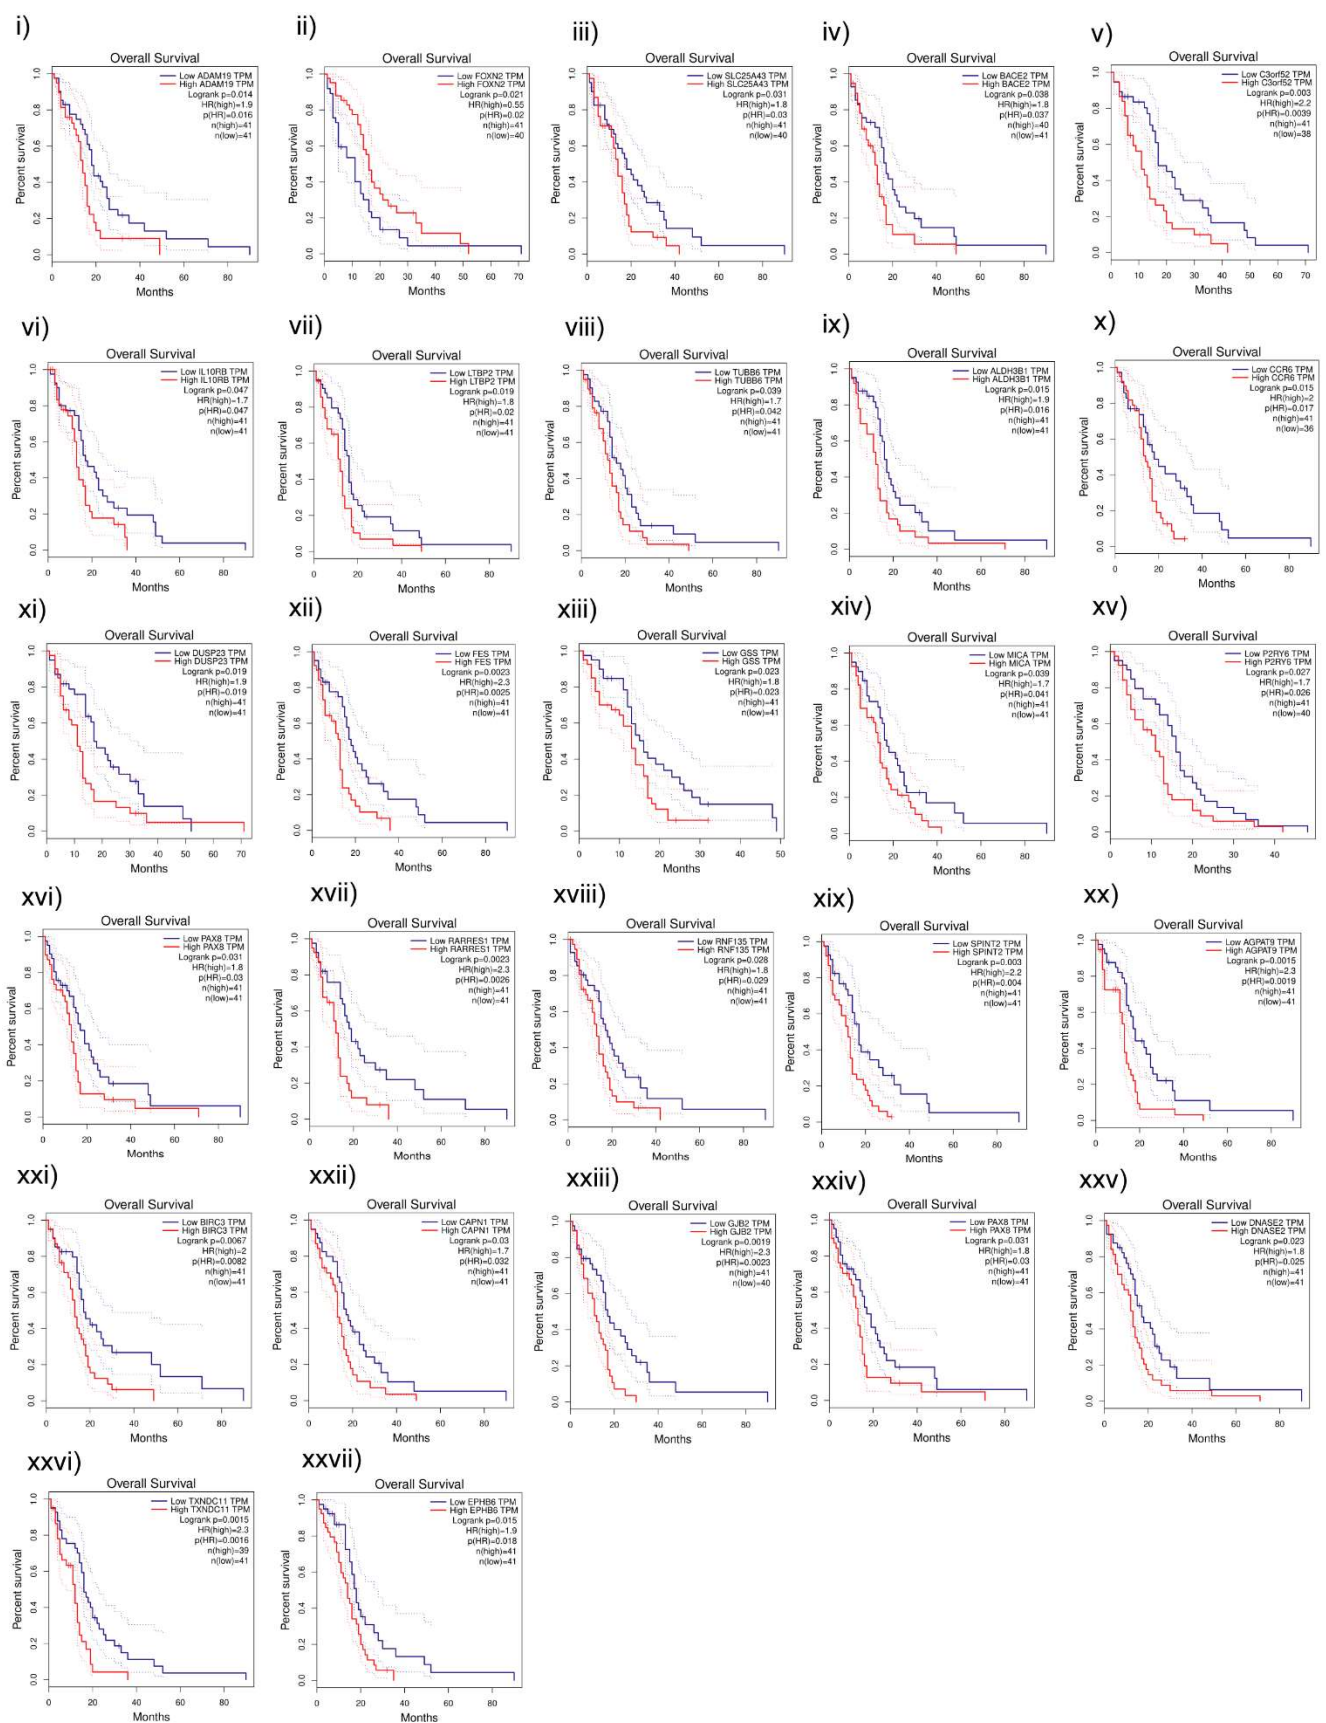

**Supplementary Figure3 (Extended figure of Figure 5)** Survival analysis using GEPIA of gene present in co-expression module. i to iii, Kaplan-Meier plots of genes from positively associated modules with classical subtype. iv to xxiv, Kaplan-Meier plots of gene from positively associated modules with mesenchymal subtype. xxv to xxvii, Kaplan-Meier plots of gene from positively associated modules with proneural subtype. Overall survival was analyzed based on quartile method of 75 % cut-off of higher and 25% cut-off of lower limit.
